# Supplementary material for: Identification Comparative Analysis of mRNAs and lncRNAs in Regulating the Development of Goat Skeletal Muscle
Source: Research Square preprint supplement (doi:10.21203/rs.3.rs-1115813/v1), 2022-02-03
Supplement: Supplementary file 1 [file 3844494b751ebb68260d8255.xlsx]

## Sheet: Sheet1
KEGG Pathway	Rich factor	P value	Gene number
2-Oxocarboxylic acid metabolism	0.176471	0.0276204	3
Acute myeloid leukemia	0.0526316	0.193694	3
Terpenoid backbone biosynthesis	0.1	0.193694	2
mTOR signaling pathway	0.0454545	0.193694	3
Proteoglycans in cancer	0.0241546	0.193694	5
Focal adhesion	0.0240385	0.193694	5
Biosynthesis of amino acids	0.0394737	0.193694	3
Thyroid cancer	0.0666667	0.193694	2
Citrate cycle (TCA cycle)	0.0666667	0.193694	2
Bladder cancer	0.0571429	0.229074	2
Serotonergic synapse	0.0265487	0.277467	3
Natural killer cell mediated cytotoxicity	0.025641	0.277467	3
Endometrial cancer	0.0392157	0.277467	2
Non-small cell lung cancer	0.0384615	0.277467	2
Lysine degradation	0.0377358	0.277467	2
Vascular smooth muscle contraction	0.0241935	0.277467	3
FoxO signaling pathway	0.023622	0.277467	3
Platelet activation	0.0234375	0.277467	3
Spliceosome	0.0220588	0.277467	3
Glioma	0.0327869	0.277467	2
